# Supplementary material
Source: PubMed Central journal article supplement (PMC6687525)
Supplement: NIHMS1529563-supplement-2.pdf [file NIHMS1529563-supplement-2.pdf]

# **SUPPLEMENTARY INFORMATION**

## **A Conserved Allosteric Pathway in Tyrosine Kinase Regulation**

William M. Marsiglia<sup>1</sup>, Joseph Katigbak<sup>1‡</sup>, Sijin Zheng<sup>1‡</sup>, Moosa Mohammadi<sup>2</sup>, Yingkai Zhang<sup>1,3</sup>, and Nathaniel J. Traaseth<sup>1\*</sup>

<sup>1</sup> Department of Chemistry, New York University, New York, NY 10003, USA

<sup>2</sup> Department of Biochemistry & Molecular Pharmacology, New York University School of Medicine, New York, NY 10016, USA

<sup>3</sup> NYU-ECNU Center for Computational Chemistry at NYU Shanghai, Shanghai 200062, China

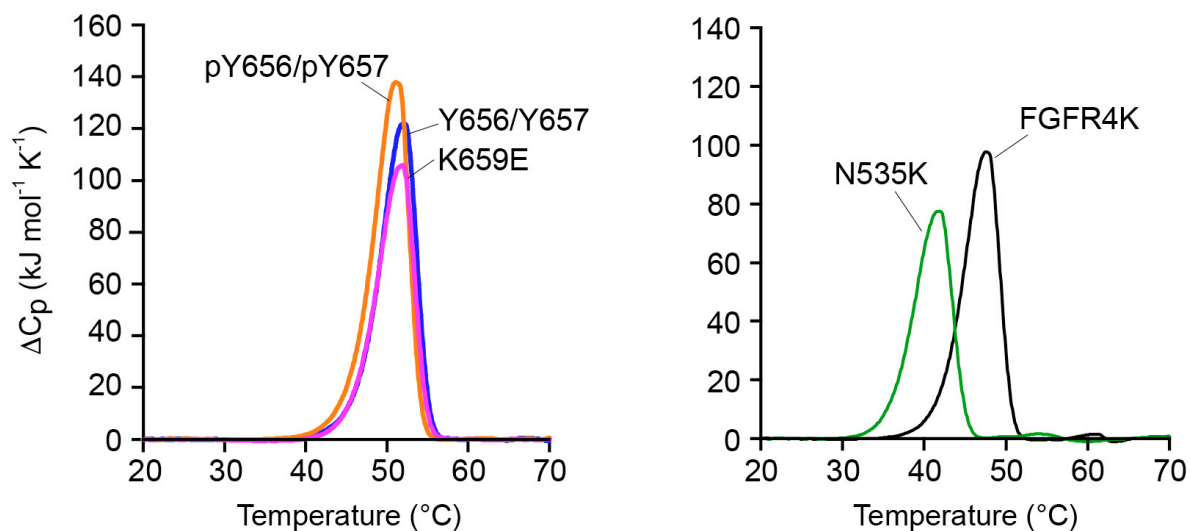

**Figure S1.** Supplemental figure related to Figure 1. Differential scanning calorimetry (DSC) thermograms showing that molecular brake mutants have a destabilizing effect relative to wild-type FGFRK, whereas A-loop mutation/phosphorylation do not change the melting temperature. (Left) Thermogram data measured using DSC comparing unphosphorylated FGFR2K (blue; Y656/Y657), A-loop phosphorylated FGFR2K (orange; pY656/pY657), and the most pathogenic A-loop mutant K659E of FGFR2K (magenta; K659E). Note that to ensure a well-defined phosphorylated state (i.e., phosphorylation at Y656 and Y657), the Y656/Y657 and pY656/pY657 samples had mutations at other tyrosine residues (Y466, Y586L, Y588S). (Right) Thermogram data measured using DSC for wild-type FGFR4K (black; FGFR4K) and an FGFR4K molecular brake mutant (green; N535K) corresponding to the N549K mutation in FGFR2K.

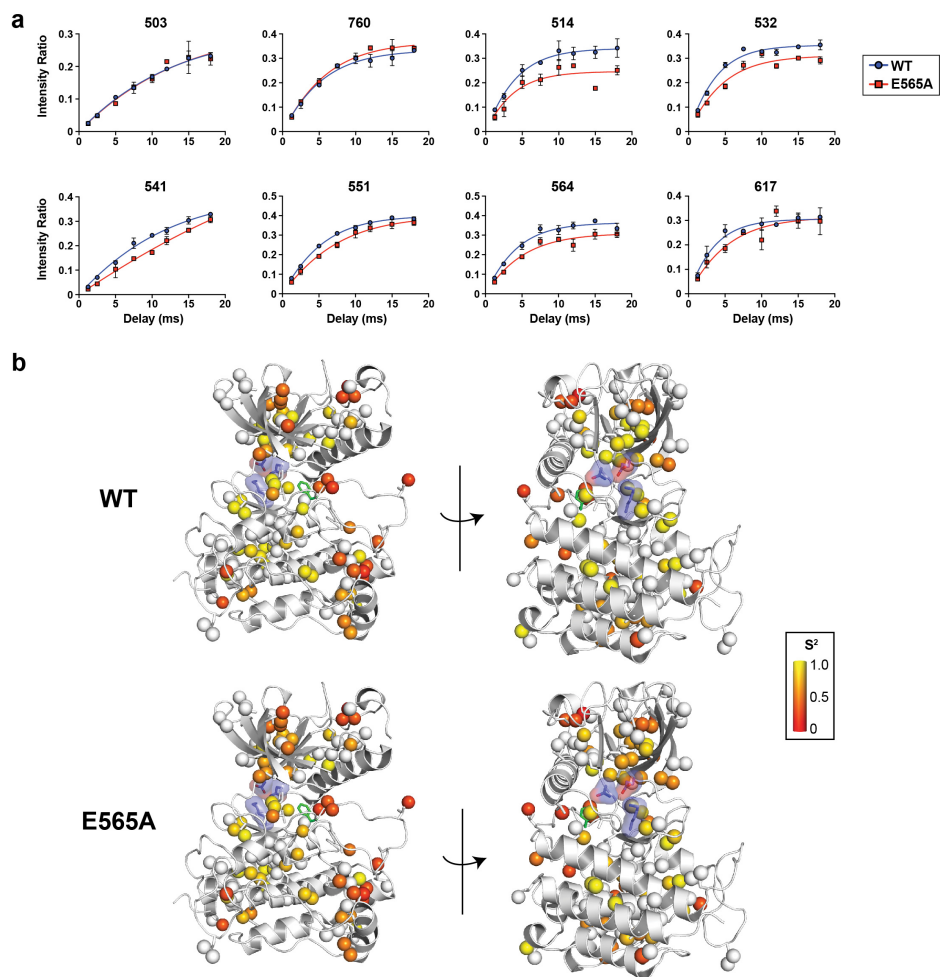

**Figure S2.** Supplemental figure related to Figure 2. (a) Representative NMR fitted curves of  $^1\text{H}$ - $^1\text{H}$  dipolar cross-correlated relaxation rate ( $\eta$ ) experiments used to derive order parameters ( $S^2$ ). Example overlays of intensity ratio curves calculated as the intensity of triple quantum (forbidden) peaks divided by single quantum intensities as a function of the mixing delay. Wild-type FGFR2K data are shown in blue circles, while the E565A mutant from FGFR2K are shown in red squares. Example curves displayed for residues I503 (in the  $\beta$ 2- $\beta$ 3 loop) and I760 (in the  $\alpha$ I helix) showed no difference in  $\eta$  ( $\text{s}^{-1}$ ) values between wild-type FGFR2K and E565A. The other plots corresponding to residues 514, 532, 541, 551, 564, and 617 displayed different  $\eta$  ( $\text{s}^{-1}$ ) values between wild-type FGFR2K and E565A. Error bars represent the standard deviation of the intensity ratio from duplicate measurements. Fitted  $\eta$  ( $\text{s}^{-1}$ ) values and corresponding errors for all residues are listed in Table S2. (b) Experimentally derived order parameters ( $S^2$ ) plotted on a cartoon representation of FGFR1K (PDB ID: 3KY2). The top panels display  $S^2$  values for wild-type FGFR2K, while the bottom panels show  $S^2$  values for the molecular brake E565A mutation of FGFR2K. Two structural views are displayed for each dataset. Spheres depict Ile, Val, and Leu methyl sites used for the NMR measurements. White spheres indicated methyl sites that could not be assigned or sites that could not be analyzed due to spectral overlap. The remaining spheres are colored according to the scale: red,  $S^2 = 0$ ; yellow,  $S^2 = 1$ . The phenylalanine displayed in green is F645 from the DFG motif, while the residues in the blue surface correspond to the molecular brake residues of FGFR2K: N549, E565, and K641.

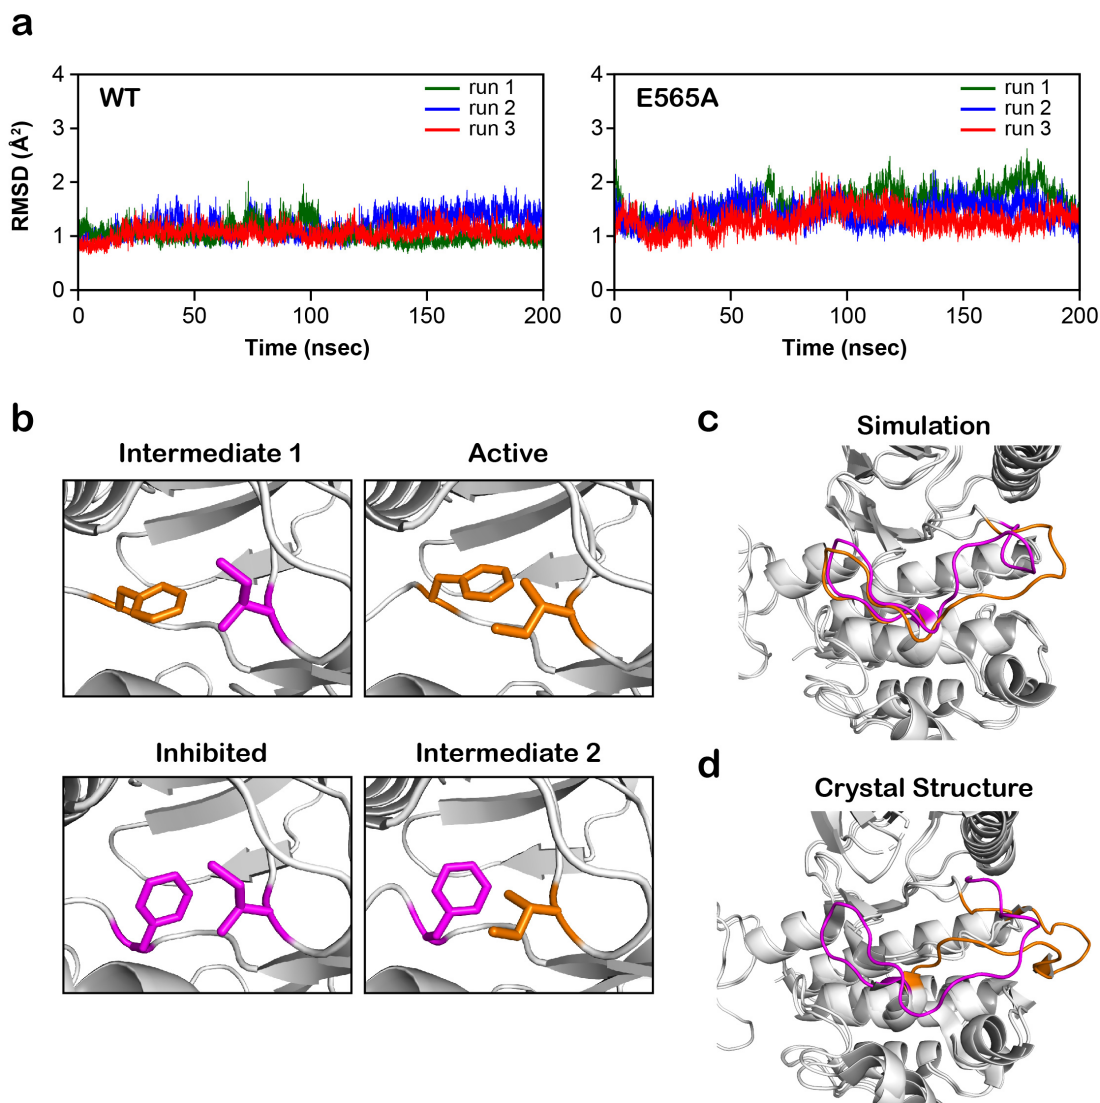

**Figure S3.** Supplemental figure related to Figure 3. (a) The RMSD time series of molecular dynamics simulations run on wild-type FGFR1K and the single site E565A mutant. Each of the three replica 200 nsec simulations are shown in a different color: run 1, green; run 2, blue; run 3, red. The plot on the left displays wild-type FGFR1K, while the plot on the right displays the E565A results. RMSD values were calculated using heavy atoms (CA, C', N, and O) of the kinase domain that excluded the A-loop and kinase insert regions. (b) Representative structural views from molecular dynamics simulations highlighting residues I547 and F645 (i.e., Phe from DFG motif). The four rotamer combinations correspond to those displayed in Figure 3b and 3c. The inhibited-like rotamers are shown in magenta and the active-like rotamers are shown in orange. (c) Superimposition of representative structures from molecular dynamics simulations highlighting the A-loop conformations. The magenta A-loop corresponds to inhibited rotamers of I547 and F645 as depicted in panel (b), while the orange A-loop has active-like rotamers for I547 and F645. (d) Superimposition of inhibited (PDB ID: 3KY2) and active crystal structures (PDB ID: 2PVF) with the A-loops of the kinase highlighted in magenta (inhibited) and orange (active) colors.

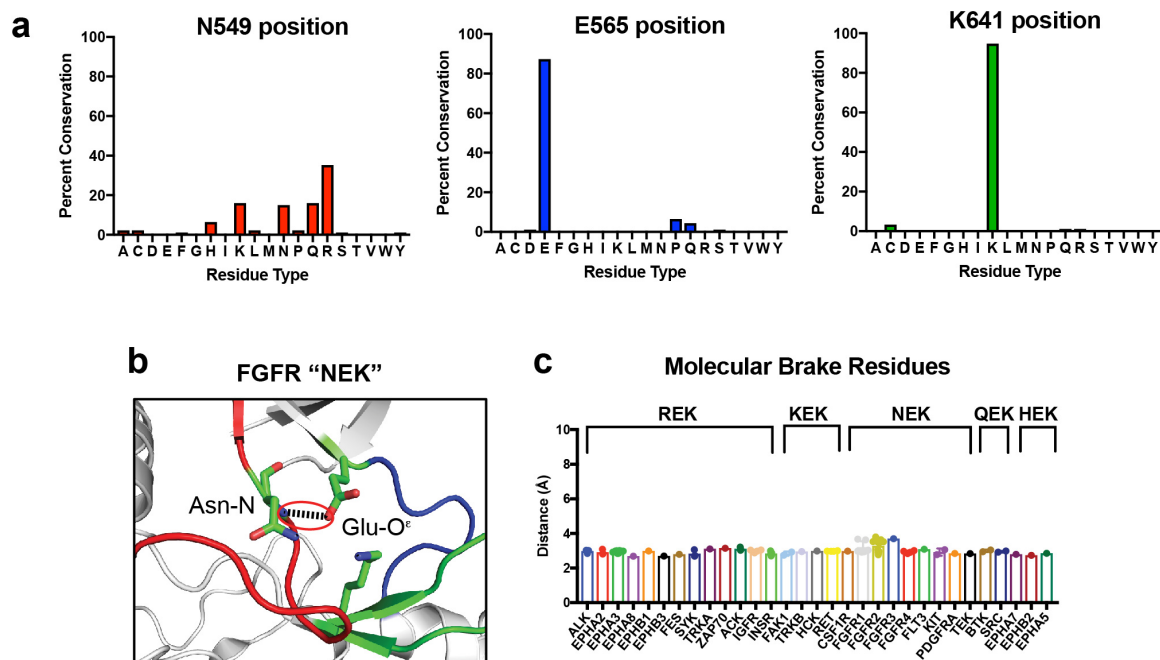

**Figure S4.** Supplemental figure related to Figure 4. (a) The molecular brake residues glutamic acid and lysine are highly conserved in tyrosine kinases. Homology modeling results of all tyrosine kinases at the three molecular brake residues displayed as the conservation of the position (normalized to 100%) as a function of the 20 amino acid residues. The molecular brake residues of N549 (left, red), E565 (center, blue), and K641 (right; green) correspond to the numbering convention of FGFR2K. (b) Structural view of the molecular brake for FGFR1K (PDB ID: 3KY2) depicting the interaction between the side chain oxygen of the glutamic acid (E565 in FGFR2K numbering) with the backbone nitrogen from the asparagine position (N549 in FGFR2K numbering). The kinase molecule is shown as a gray cartoon;  $\alpha$ C- $\beta$ 4 loop, kinase hinge, and  $\beta$ 8 strand contributing residues to the molecular brake are highlighted in red, blue and green, respectively. The triad of residues (i.e., N549, E565 and K641) comprising the molecular brake are shown as green sticks. Oxygen and nitrogen atoms are colored red and blue, respectively; the hydrogen bond between E565 and N549 is denoted by a dashed black line. (c) Conservation of hydrogen bonding at the molecular brake for tyrosine kinases that do not share the asparagine position of the molecular brake present within the FGFR subfamily. Measured distances for available tyrosine kinase structures within the PDB corresponding to the backbone nitrogen of the analogous N549 position (FGFR2K numbering) with the side chain oxygen of the analogous E565 (FGFR2K numbering). Note that only kinases sharing the glutamic acid and lysine positions within the molecular brake were analyzed. The three letter titles above the brackets depict the three residues comprising the molecular brake. For example, kinases with asparagine, glutamic acid, and lysine are labeled “NEK” and are shared in FGFR, VEGFR, PDGFR, c-KIT, TIE, TEK, CSF1R, and FLT3.

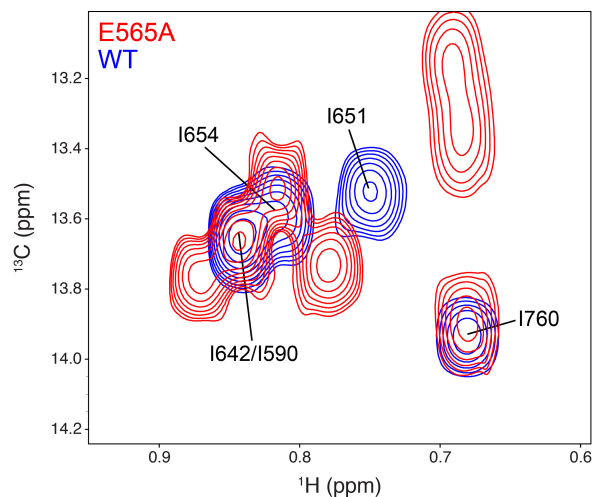

**Figure S5.** Supplemental figure related to Figure 2. Mutation at the molecular brake perturbs chemical shifts corresponding residues within the A-loop.  $^1\text{H}/^{13}\text{C}$  HMQC spectra of ILV labeled wild-type FGFR2K (blue spectra) and the single site mutation E565A of FGFR2K (red spectra). The spectral overlay highlights that A-loop residues such as I651 and I654 are perturbed between wild-type FGFR2K and the molecular brake mutant. Both HMQC datasets were acquired at 10 °C and the concentration of each kinase was 0.5 mM.

**Table S1.** Supplemental table related to Figure 1. Mutations in cancers that occur in one of the three molecular brake residues of tyrosine kinases. Data were obtained from the Catalogue of Somatic Mutations in Cancer (COSMIC) database: <https://cancer.sanger.ac.uk/cosmic>.

| <b>Kinase</b> | <b>Molecular Brake<sup>a</sup></b> | <b>N549 position</b> | <b>E565 position</b> | <b>K641 position</b> |
|---------------|------------------------------------|----------------------|----------------------|----------------------|
| <b>EGFR</b>   | RQK                                | C/H/S/L/G            |                      | N/R                  |
| <b>ErbB2</b>  | RQK                                | K/H                  | P                    |                      |
| <b>ErbB4</b>  | RQK                                | Q                    |                      |                      |
| <b>EphA3</b>  | REK                                | Q                    | K                    | N/M                  |
| <b>EphA6</b>  | REK                                |                      |                      | N                    |
| <b>EphB1</b>  | REK                                | C/H                  |                      |                      |
| <b>EphB3</b>  | REK                                | W                    | Q                    |                      |
| <b>EphB4</b>  | REK                                | C                    |                      |                      |
| <b>EphA8</b>  | REK                                | H                    |                      |                      |
| <b>EphA2</b>  | REK                                | L/C                  |                      |                      |
| <b>LYN</b>    | REK                                | S                    | Q                    |                      |
| <b>BLK</b>    | REK                                | Q                    |                      |                      |
| <b>FES</b>    | REK                                | H                    |                      |                      |
| <b>IGF1R</b>  | REK                                |                      |                      | R                    |
| <b>EphA5</b>  | HEK                                |                      | Q/V                  |                      |
| <b>EphA7</b>  | HEK                                | N                    |                      |                      |
| <b>EphB2</b>  | HEK                                |                      | K                    | R                    |
| <b>DDR2</b>   | HEK                                |                      |                      | N                    |
| <b>JAK2</b>   | KEK                                | T                    |                      |                      |
| <b>JAK3</b>   | KEK                                | E                    |                      |                      |
| <b>MUSK</b>   | KEK                                |                      | D                    |                      |
| <b>HCK</b>    | KEK                                |                      | K                    |                      |
| <b>RET</b>    | KEK                                | N/E                  |                      |                      |
| <b>ABL</b>    | QEK                                |                      |                      | R                    |
| <b>SRC</b>    | QEK                                |                      | K                    |                      |
| <b>FGFR2</b>  | NEK                                | S/D/K/H              | K/G/A                | R                    |
| <b>FGFR3</b>  | NEK                                | S                    |                      |                      |
| <b>FGFR1</b>  | NEK                                | K/D                  |                      |                      |
| <b>FGFR4</b>  | NEK                                | K                    |                      |                      |
| <b>KDR</b>    | NEK                                | S                    |                      |                      |
| <b>KIT</b>    | NEK                                | K                    |                      | N/R                  |
| <b>PDGFRa</b> | NEK                                | K/Y/S/D/H            | Q                    |                      |
| <b>PDGFRb</b> | NEK                                | S                    |                      |                      |
| <b>FLT3</b>   | NEK                                | K/T                  |                      |                      |
| <b>TIE1</b>   | NEK                                |                      | G                    |                      |
| <b>AXL</b>    | RPC                                | K                    | L                    |                      |
| <b>MET</b>    | SPK                                | W                    |                      |                      |
| <b>DDR1</b>   | RDK                                | W/L                  |                      |                      |
| <b>ROR1</b>   | CEK                                |                      |                      | N                    |
| <b>ROR2</b>   | CSK                                |                      |                      | N                    |

<sup>a</sup> The three molecular brake positions of N549, E565, and K641 correspond to the numbering of FGFR2K and are denoted as “NEK” under the “Molecular Brake” heading.

**Table S2.** Supplemental table related to Figure 2 that lists NMR derived order parameters ( $S^2$ ) and  $\eta$  values for wild-type FGFR2K (top) and E565A (bottom). Errors reflect non-linear least square fitting errors from datasets acquired in duplicate.

|           | Residue | $\eta$ ( $s^{-1}$ ) | Error $\eta$ ( $s^{-1}$ ) | $S^2$ | Error $S^2$ |
|-----------|---------|---------------------|---------------------------|-------|-------------|
|           | I503    | 31.30               | 1.76                      | 0.32  | 0.02        |
|           | I541    | 43.45               | 2.12                      | 0.45  | 0.02        |
|           | I547    | 90.54               | 9.48                      | 0.93  | 0.10        |
|           | I548    | 99.12               | 5.97                      | 1.02  | 0.06        |
|           | I563    | 77.46               | 9.01                      | 0.80  | 0.09        |
|           | I590    | 37.89               | 0.82                      | 0.39  | 0.01        |
|           | I623    | 55.14               | 2.79                      | 0.57  | 0.03        |
|           | I651    | 27.68               | 1.48                      | 0.28  | 0.02        |
|           | I654    | 40.29               | 0.92                      | 0.41  | 0.01        |
|           | I696    | 89.81               | 6.15                      | 0.92  | 0.06        |
|           | I707    | 30.11               | 0.87                      | 0.31  | 0.01        |
|           | I760    | 76.85               | 5.61                      | 0.79  | 0.06        |
|           | V463    | 12.16               | 0.33                      | 0.12  | 0.00        |
|           | V495    | 83.37               | 4.11                      | 0.86  | 0.04        |
|           | V496    | 36.95               | 0.97                      | 0.38  | 0.01        |
|           | V512    | 72.72               | 3.88                      | 0.75  | 0.04        |
|           | V514    | 104.10              | 8.29                      | 1.07  | 0.09        |
|           | V514    | 102.30              | 10.63                     | 1.05  | 0.11        |
|           | V516    | 96.38               | 5.29                      | 0.99  | 0.05        |
|           | V516    | 92.10               | 3.98                      | 0.95  | 0.04        |
|           | V532    | 117.80              | 7.10                      | 1.21  | 0.07        |
|           | V532    | 94.92               | 3.38                      | 0.97  | 0.03        |
|           | V562    | 107.10              | 3.38                      | 1.10  | 0.03        |
| wild-type | V564    | 102.30              | 4.30                      | 1.05  | 0.04        |
|           | V564    | 106.20              | 7.97                      | 1.09  | 0.08        |
|           | V593    | 55.21               | 2.32                      | 0.57  | 0.02        |
|           | V593    | 39.81               | 1.56                      | 0.41  | 0.02        |
|           | V634    | 95.61               | 5.71                      | 0.98  | 0.06        |
|           | V634    | 101.80              | 9.39                      | 1.05  | 0.10        |
|           | V639    | 92.51               | 7.08                      | 0.95  | 0.07        |
|           | V667    | 91.44               | 4.83                      | 0.94  | 0.05        |
|           | V679    | 67.13               | 2.90                      | 0.69  | 0.03        |
|           | V691    | 91.93               | 11.23                     | 0.94  | 0.12        |
|           | V691    | 89.65               | 7.04                      | 0.92  | 0.07        |
|           | V709    | 20.91               | 0.97                      | 0.21  | 0.01        |
|           | V709    | 43.92               | 1.75                      | 0.45  | 0.02        |
|           | V743    | 112.20              | 8.38                      | 1.15  | 0.09        |
|           | V754    | 107.80              | 3.57                      | 1.11  | 0.04        |
|           | V754    | 94.86               | 3.85                      | 0.97  | 0.04        |
|           | L468    | 36.05               | 2.35                      | 0.37  | 0.02        |
|           | L468    | 30.18               | 1.17                      | 0.31  | 0.01        |
|           | L481    | 55.13               | 4.37                      | 0.57  | 0.04        |
|           | L481    | 53.18               | 2.65                      | 0.55  | 0.03        |
|           | L483    | 46.64               | 2.95                      | 0.48  | 0.03        |
|           | L483    | 50.81               | 1.58                      | 0.52  | 0.02        |
|           | L487    | 65.60               | 3.86                      | 0.67  | 0.04        |
|           | L487    | 51.79               | 2.93                      | 0.53  | 0.03        |



|           |      |        |       |      |      |
|-----------|------|--------|-------|------|------|
|           | L519 | 74.62  | 3.07  | 0.77 | 0.03 |
|           | L531 | 105.20 | 4.08  | 1.08 | 0.04 |
|           | L551 | 96.23  | 3.03  | 0.99 | 0.03 |
|           | L551 | 90.61  | 2.05  | 0.93 | 0.02 |
|           | L560 | 88.27  | 6.56  | 0.91 | 0.07 |
|           | L576 | 84.85  | 6.33  | 0.87 | 0.06 |
|           | L576 | 101.10 | 2.70  | 1.04 | 0.03 |
|           | L603 | 96.98  | 4.25  | 1.00 | 0.04 |
|           | L617 | 110.40 | 9.65  | 1.13 | 0.10 |
|           | L627 | 79.33  | 4.08  | 0.81 | 0.04 |
|           | L633 | 99.25  | 2.95  | 1.02 | 0.03 |
|           | L647 | 36.24  | 1.97  | 0.37 | 0.02 |
|           | L647 | 25.80  | 1.76  | 0.26 | 0.02 |
| wild-type | L665 | 40.15  | 1.20  | 0.41 | 0.01 |
|           | L675 | 37.25  | 2.44  | 0.38 | 0.03 |
|           | L675 | 30.47  | 2.75  | 0.31 | 0.03 |
|           | L712 | 66.71  | 4.87  | 0.68 | 0.05 |
|           | L633 | 63.89  | 5.07  | 0.66 | 0.05 |
|           | L692 | 82.24  | 4.94  | 0.84 | 0.05 |
|           | L699 | 32.99  | 2.39  | 0.34 | 0.02 |
|           | L715 | 55.40  | 2.36  | 0.57 | 0.02 |
|           | L715 | 63.57  | 3.84  | 0.65 | 0.04 |
|           | L716 | 75.00  | 4.48  | 0.77 | 0.05 |
|           | L732 | 70.73  | 2.61  | 0.73 | 0.03 |
|           | L732 | 58.93  | 3.11  | 0.61 | 0.03 |
|           | L757 | 101.20 | 4.67  | 1.04 | 0.05 |
|           | L761 | 48.14  | 2.00  | 0.49 | 0.02 |
|           | L763 | 34.90  | 0.71  | 0.36 | 0.01 |
| <hr/>     |      |        |       |      |      |
|           | I503 | 30.37  | 3.47  | 0.31 | 0.04 |
|           | I541 | 26.42  | 1.75  | 0.27 | 0.02 |
|           | I547 | 87.43  | 5.80  | 0.90 | 0.06 |
|           | I548 | 89.70  | 8.10  | 0.92 | 0.08 |
|           | I563 | 74.02  | 7.81  | 0.76 | 0.08 |
|           | I590 | 25.10  | 1.19  | 0.26 | 0.01 |
|           | I623 | 51.20  | 3.41  | 0.53 | 0.04 |
|           | I651 | 26.03  | 1.63  | 0.27 | 0.02 |
|           | I654 | 31.01  | 2.57  | 0.32 | 0.03 |
|           | I696 | 82.91  | 8.00  | 0.85 | 0.08 |
|           | I707 | 28.87  | 2.86  | 0.30 | 0.03 |
| E565A     | I760 | 76.56  | 3.92  | 0.79 | 0.04 |
|           | V463 | 12.19  | 0.52  | 0.13 | 0.01 |
|           | V495 | 63.74  | 4.31  | 0.65 | 0.04 |
|           | V496 | 50.62  | 2.45  | 0.52 | 0.03 |
|           | V512 | 57.17  | 4.96  | 0.59 | 0.05 |
|           | V514 | 84.75  | 16.44 | 0.87 | 0.17 |
|           | V514 | 91.61  | 11.10 | 0.94 | 0.11 |
|           | V516 | 71.54  | 8.73  | 0.73 | 0.09 |
|           | V516 | 72.35  | 7.93  | 0.74 | 0.08 |
|           | V532 | 84.41  | 8.35  | 0.87 | 0.09 |
|           | V532 | 88.49  | 6.96  | 0.91 | 0.07 |
|           | V562 | 101.60 | 20.46 | 1.04 | 0.21 |

|       |      |        |       |      |      |
|-------|------|--------|-------|------|------|
|       | V564 | 77.11  | 7.27  | 0.79 | 0.07 |
|       | V564 | 82.36  | 6.62  | 0.85 | 0.07 |
|       | V593 | 51.70  | 2.38  | 0.53 | 0.02 |
|       | V593 | 37.28  | 1.01  | 0.38 | 0.01 |
|       | V634 | 82.62  | 12.31 | 0.85 | 0.13 |
|       | V634 | 96.47  | 13.01 | 0.99 | 0.13 |
|       | V639 | 87.04  | 9.56  | 0.89 | 0.10 |
|       | V667 | 98.02  | 10.43 | 1.01 | 0.11 |
|       | V679 | 60.82  | 2.60  | 0.62 | 0.03 |
|       | V691 | 82.50  | 17.43 | 0.85 | 0.18 |
|       | V691 | 80.17  | 8.98  | 0.82 | 0.09 |
|       | V709 | 22.29  | 1.88  | 0.23 | 0.02 |
|       | V709 | 37.99  | 1.91  | 0.39 | 0.02 |
|       | V743 | 95.85  | 7.48  | 0.98 | 0.08 |
|       | V754 | 101.90 | 6.83  | 1.05 | 0.07 |
|       | V754 | 93.38  | 3.55  | 0.96 | 0.04 |
|       | L468 | 36.10  | 1.54  | 0.37 | 0.02 |
|       | L468 | 31.72  | 2.38  | 0.33 | 0.02 |
|       | L481 | 44.63  | 4.82  | 0.46 | 0.05 |
|       | L481 | 47.79  | 4.96  | 0.49 | 0.05 |
|       | L483 | 37.01  | 2.87  | 0.38 | 0.03 |
|       | L483 | 53.11  | 1.88  | 0.55 | 0.02 |
|       | L487 | 63.09  | 4.53  | 0.65 | 0.05 |
|       | L487 | 57.21  | 2.52  | 0.59 | 0.03 |
|       | L519 | 63.88  | 4.22  | 0.66 | 0.04 |
| E565A | L531 | 107.90 | 4.96  | 1.11 | 0.05 |
|       | L551 | 68.59  | 4.68  | 0.70 | 0.05 |
|       | L551 | 67.28  | 3.55  | 0.69 | 0.04 |
|       | L560 | 82.82  | 7.52  | 0.85 | 0.08 |
|       | L576 | 82.57  | 9.31  | 0.85 | 0.10 |
|       | L576 | 103.20 | 5.92  | 1.06 | 0.06 |
|       | L603 | 87.70  | 7.05  | 0.90 | 0.07 |
|       | L617 | 74.99  | 11.32 | 0.77 | 0.12 |
|       | L627 | 77.72  | 9.92  | 0.80 | 0.10 |
|       | L633 | 88.73  | 8.61  | 0.91 | 0.09 |
|       | L647 | 38.11  | 2.73  | 0.39 | 0.03 |
|       | L647 | 37.20  | 4.30  | 0.38 | 0.04 |
|       | L665 | 47.07  | 2.79  | 0.48 | 0.03 |
|       | L675 | 35.02  | 2.16  | 0.36 | 0.02 |
|       | L675 | 28.31  | 1.84  | 0.29 | 0.02 |
|       | L712 | 60.56  | 4.81  | 0.62 | 0.05 |
|       | L633 | 53.40  | 6.19  | 0.55 | 0.06 |
|       | L692 | 77.14  | 7.91  | 0.79 | 0.08 |
|       | L699 | 31.77  | 1.89  | 0.33 | 0.02 |
|       | L715 | 53.32  | 5.03  | 0.55 | 0.05 |
|       | L715 | 52.63  | 3.57  | 0.54 | 0.04 |
|       | L716 | 62.77  | 5.51  | 0.64 | 0.06 |
|       | L732 | 78.26  | 3.07  | 0.80 | 0.03 |
|       | L732 | 57.15  | 6.43  | 0.59 | 0.07 |
|       | L757 | 109.20 | 5.03  | 1.12 | 0.05 |
|       | L761 | 51.78  | 5.95  | 0.53 | 0.06 |
|       | L763 | 34.80  | 1.62  | 0.36 | 0.02 |

---

**Table S3.** Supplemental table related to Figure 4. Bioinformatic analysis of tyrosine kinases used to derive a general activation mechanism involving the molecular brake.

| Kinase | Molecular Brake <sup>a</sup> | PDB ID   | Residue at 547 position | Residue at 645 position | “I547” chi1 (deg) | “F645” chi1 (deg) | “I547-K641” distance (Å) <sup>b</sup> |
|--------|------------------------------|----------|-------------------------|-------------------------|-------------------|-------------------|---------------------------------------|
| ALK    | REK                          | 2yjs     | I1179                   | F1271                   | -64.5             | -70.0             | 5.0                                   |
| ALK    | REK                          | 4anl     | I1179                   | F1271                   | -66.4             | -67.5             | 4.9                                   |
| ALK    | REK                          | 4fnw     | I1179                   | F1271                   | -67.1             | -70.8             | 5.0                                   |
| ALK    | REK                          | 2yjr     | I1179                   | F1271                   | -63.5             | -65.1             | 5.1                                   |
| ALK    | REK                          | 4fnx     | I1179                   | F1271                   | -65.1             | -65.6             | 5.1                                   |
| ALK    | REK                          | 2yhv     | I1179                   | F1271                   | -63.2             | -71.0             | 5.1                                   |
| ALK    | REK                          | 3lct     | I1179                   | F1271                   | -57.4             | -68.6             | 5.2                                   |
| ALK    | REK                          | 3l9p     | I1179                   | F1271                   | -65.7             | -68.8             | 5.0                                   |
| EPHA2  | REK                          | 4p2k     | I675                    | F758                    | -62.6             | -74.2             | 5.1                                   |
| EPHA2  | REK                          | 4trl     | I675                    | F758                    | -64.3             | -60.6             | 5.0                                   |
| EPHA2  | REK                          | 1mqb (1) | I675                    | F758                    | -59.9             | -53.4             | 4.7                                   |
| EPHA2  | REK                          | 1mqb (2) | I675                    | F758                    | -58.4             | -67.0             | 4.4                                   |
| EPHA3  | REK                          | 2qoi     | I682                    | F765                    | -54.2             | -66.7             | 5.2                                   |
| EPHA3  | REK                          | 2qof     | I682                    | F765                    | -55.6             | -65.7             | 5.2                                   |
| EPHA3  | REK                          | 2qod     | I682                    | F765                    | -58.2             | -67.5             | 5.3                                   |
| EPHA3  | REK                          | 2qol     | I682                    | F765                    | -55.0             | -68.7             | 5.2                                   |
| EPHA3  | REK                          | 2qoo     | I682                    | F765                    | -53.1             | -63.7             | 5.3                                   |
| EPHA3  | REK                          | 2qoc     | I682                    | F765                    | -59.6             | -62.9             | 5.2                                   |
| EPHA3  | REK                          | 2gsf     | I682                    | F765                    | -66.2             | -66.9             | 5.2                                   |
| EPHA3  | REK                          | 2qo7     | I682                    | F765                    | -57.5             | -62.4             | 5.1                                   |
| EPHA8  | REK                          | 3kul (1) | I696                    | F779                    | -55.8             | -63.8             | 4.8                                   |
| EPHA8  | REK                          | 3kul (2) | I696                    | F779                    | -55.9             | -61.3             | 5.0                                   |
| EPHB1  | REK                          | 3zfx (1) | I680                    | F763                    | -61.7             | -62.1             | 4.8                                   |
| EPHB1  | REK                          | 3zfx (2) | I680                    | F763                    | -58.1             | -62.1             | 4.7                                   |
| EPHB1  | REK                          | 3zfx (3) | I680                    | F763                    | -58.6             | -66.1             | 4.8                                   |
| EPHB1  | REK                          | 3zfx (4) | I680                    | F763                    | -64.6             | -63.9             | 5.0                                   |
| EPHB1  | REK                          | 3zfx (5) | I680                    | F763                    | -61.6             | -63.4             | 4.8                                   |
| EPHB1  | REK                          | 3zfx (6) | I680                    | F763                    | -63.4             | -61.1             | 4.9                                   |
| EPHB1  | REK                          | 3zfx (7) | I680                    | F763                    | -61.4             | -64.2             | 4.9                                   |
| EPHB1  | REK                          | 3zfx (8) | I680                    | F763                    | -68.0             | -62.7             | 5.2                                   |
| EPHB1  | REK                          | 3zfx (9) | I680                    | F763                    | -61.3             | -64.6             | 4.6                                   |
| SYK    | REK                          | 4fl1     | I432                    | F513                    | -66.3             | -73.0             | 4.2                                   |
| SYK    | REK                          | 1xba     | I432                    | F513                    | -62.4             | -70.7             | 3.9                                   |
| SYK    | REK                          | 4xg2     | I432                    | F513                    | -63.5             | -69.4             | 3.8                                   |

|              |     |          |      |      |       |       |     |
|--------------|-----|----------|------|------|-------|-------|-----|
| <b>ZAP70</b> | REK | 4k2r     | I398 | F480 | 66.1  | 31.3  | 3.1 |
| <b>FAK1</b>  | KEK | 2ijm (1) | I483 | F565 | -69.5 | -51.1 | 5.2 |
| <b>FAK1</b>  | KEK | 2ijm (2) | I483 | F565 | -68   | -76.2 | 5.0 |
| <b>FAK2</b>  | KEK | 3cc6     | I486 | F568 | -56.0 | -75.5 | 4.6 |
| <b>FAK2</b>  | KEK | 3fzo     | I486 | F568 | -56.4 | -81.9 | 4.3 |
| <b>FGFR1</b> | NEK | 4rwi (1) | I544 | F642 | 68.1  | 54.3  | 3.0 |
| <b>FGFR1</b> | NEK | 4rwi (2) | I544 | F642 | 69.5  | 57.5  | 3.2 |
| <b>FGFR1</b> | NEK | 3kxx (1) | I544 | F642 | -70.3 | -63.8 | 4.1 |
| <b>FGFR1</b> | NEK | 3kxx (2) | I544 | F642 | -61.9 | -66.2 | 3.6 |
| <b>FGFR1</b> | NEK | 3kxx (3) | I544 | F642 | 52.3  | -63.7 | 3.5 |
| <b>FGFR1</b> | NEK | 3kxx (4) | I544 | F642 | 67.9  | -65.9 | 3.4 |
| <b>FGFR1</b> | NEK | 5flf (1) | I544 | F642 | -62.5 | -72.5 | 3.7 |
| <b>FGFR1</b> | NEK | 5flf (2) | I544 | F642 | -66.8 | -75.9 | 4.4 |
| <b>FGFR1</b> | NEK | 5flf (3) | I544 | F642 | -53.1 | -70.1 | 3.7 |
| <b>FGFR1</b> | NEK | 5flf (4) | I544 | F642 | -68.3 | -71.1 | 3.6 |
| <b>FGFR1</b> | NEK | 5flf (5) | I544 | F642 | 63.5  | 46.9  | 3.3 |
| <b>FGFR1</b> | NEK | 4uwy (1) | I544 | F642 | 67.4  | 54.1  | 3.2 |
| <b>FGFR1</b> | NEK | 4uwy (2) | I544 | F642 | 66.8  | 53.8  | 3.3 |
| <b>FGFR1</b> | NEK | 3ky2 (1) | I544 | F642 | 62.4  | 57.0  | 3.5 |
| <b>FGFR1</b> | NEK | 3ky2 (2) | I544 | F642 | 59.3  | 55.6  | 3.3 |
| <b>FGFR1</b> | NEK | 1fgk (1) | I544 | F642 | 74.7  | 57.8  | 3.1 |
| <b>FGFR1</b> | NEK | 1fgk (2) | I544 | F642 | 68.5  | 56.5  | 3.2 |
| <b>FGFR1</b> | NEK | 3gqi     | I544 | F642 | -80.4 | -71.6 | 4.7 |
| <b>FGFR2</b> | NEK | 2pvf     | I547 | F645 | -68.4 | -68.9 | 4.6 |
| <b>FGFR2</b> | NEK | 2q0b (1) | I547 | F645 | -67.9 | -74.6 | 4.1 |
| <b>FGFR2</b> | NEK | 2q0b (2) | I547 | F645 | -73.4 | -63.3 | 3.3 |
| <b>FGFR2</b> | NEK | 4j95 (1) | I547 | F645 | 69.6  | -67.7 | 3.6 |
| <b>FGFR2</b> | NEK | 4j95 (2) | I547 | F645 | -81.8 | -69.8 | 3.4 |
| <b>FGFR2</b> | NEK | 4j95 (3) | I547 | F645 | 81.6  | -70.6 | 3.7 |
| <b>FGFR2</b> | NEK | 4j95 (4) | I547 | F645 | -83.1 | -70.5 | 3.7 |
| <b>FGFR2</b> | NEK | 4j97 (1) | I547 | F645 | -64.9 | -69.4 | 5.0 |
| <b>FGFR2</b> | NEK | 4j97 (2) | I547 | F645 | -65.3 | -66.3 | 5.1 |
| <b>FGFR2</b> | NEK | 4j97 (3) | I547 | F645 | -69.0 | -65.8 | 4.3 |
| <b>FGFR2</b> | NEK | 4j97 (4) | I547 | F645 | -80.3 | -68.3 | 5.1 |
| <b>FGFR2</b> | NEK | 4j96 (1) | I547 | F645 | -73.3 | -74.9 | 3.3 |
| <b>FGFR2</b> | NEK | 4j96 (2) | I547 | F645 | -70.2 | -76.3 | 4.2 |
| <b>FGFR2</b> | NEK | 2pzp (1) | I547 | F645 | -68.8 | -71.2 | 4.4 |
| <b>FGFR2</b> | NEK | 2pzp (2) | I547 | F645 | -66.6 | -71.5 | 3.9 |
| <b>FGFR2</b> | NEK | 2pwl (1) | I547 | F645 | -74.2 | -67.0 | 4.1 |
| <b>FGFR2</b> | NEK | 2pwl (2) | I547 | F645 | -66.1 | -66.4 | 4.2 |

|              |     |          |       |       |       |       |     |
|--------------|-----|----------|-------|-------|-------|-------|-----|
| <b>FGFR2</b> | NEK | 4j98 (1) | I547  | F645  | -80.1 | -74.7 | 3.2 |
| <b>FGFR2</b> | NEK | 4j98 (2) | I547  | F645  | -79.6 | -74.9 | 3.8 |
| <b>FGFR2</b> | NEK | 2pvy (1) | I547  | F645  | -78.3 | -66.2 | 4.8 |
| <b>FGFR2</b> | NEK | 2pvy (2) | I547  | F645  | -76.6 | -66.2 | 5.2 |
| <b>FGFR2</b> | NEK | 2pvy (3) | I547  | F645  | -74.3 | -66.7 | 4.1 |
| <b>FGFR2</b> | NEK | 2pvy (4) | I547  | F645  | -76.2 | -66.5 | 4.7 |
| <b>FGFR2</b> | NEK | 2pz5 (1) | I547  | F645  | -69.4 | -71.7 | 4.3 |
| <b>FGFR2</b> | NEK | 2pz5 (2) | I547  | F645  | -72.2 | -70.9 | 4.2 |
| <b>FGFR2</b> | NEK | 4j99 (1) | I547  | F645  | 77.9  | -68.2 | 3.4 |
| <b>FGFR2</b> | NEK | 4j99 (2) | I547  | F645  | 74.9  | -69.0 | 4.2 |
| <b>FGFR2</b> | NEK | 4j99 (3) | I547  | F645  | -66.9 | -68.3 | 3.2 |
| <b>FGFR2</b> | NEK | 4j99 (4) | I547  | F645  | 78.5  | -67.2 | 3.2 |
| <b>FGFR2</b> | NEK | 3b2t (1) | I547  | F645  | -65.8 | -63.9 | 4.4 |
| <b>FGFR2</b> | NEK | 3b2t (2) | I547  | F645  | -61.6 | -62.9 | 4.1 |
| <b>FGFR2</b> | NEK | 3cly     | I1547 | F1645 | -64.8 | -69.5 | 5.1 |
| <b>FGFR2</b> | NEK | 2py3 (1) | I547  | F645  | -74.6 | -72.0 | 5.2 |
| <b>FGFR2</b> | NEK | 2py3 (2) | I547  | F645  | -73.9 | -72.2 | 4.3 |
| <b>FGFR2</b> | NEK | 2psq (1) | I547  | F645  | -75.9 | -61.0 | 3.2 |
| <b>FGFR2</b> | NEK | 2psq (2) | I547  | F645  | -75.8 | -64.1 | 2.5 |
| <b>FGFR3</b> | NEK | 4k33     | I538  | F636  | -71.2 | -68.2 | 4.9 |
| <b>FGFR4</b> | NEK | 4qqj     | I533  | F631  | 72.5  | 51.7  | 3.1 |
| <b>FGFR4</b> | NEK | 4tyg     | I533  | F631  | 70.9  | 55.8  | 4.0 |
| <b>FGFR4</b> | NEK | 4qqt     | I533  | F631  | 71.6  | 51.7  | 3.1 |
| <b>FGFR4</b> | NEK | 4tye     | I533  | F631  | 65.5  | 74.7  | 3.8 |
| <b>KIT</b>   | NEK | 1pkg (1) | I653  | F811  | -86.4 | -69.8 | 5.2 |
| <b>KIT</b>   | NEK | 1pkg (2) | I653  | F811  | -46.4 | -69.1 | 4.0 |
| <b>EPHA5</b> | HEK | 2r2p     | I736  | F819  | -72.7 | -52.0 | 5.1 |

<sup>a</sup> Three residues comprising the molecular brake of the respective kinase. The sites correspond to the analogous positions of N549, E565, and K641 within FGFR2K.

<sup>b</sup> The I547-K641 distance is between the side chain nitrogen of the lysine and the backbone carbonyl oxygen of the isoleucine. In FGFR2K numbering, these residues correspond to I547 and K641.
